# Supplementary material
Source: publisher figshare collection journal article supplement (https://acs.figshare.com/ndownloader/files/20457690)
Supplement: Supplementary file 1 [file 20457690]

Supporting Information for:

## **Chemical Diversity in Lead-Free, Layered Double Perovskites: A Combined Experimental and Computational Approach**

Brenda Vargas,<sup>[a†]</sup> Raúl Torres-Cadena,<sup>[a†]</sup> Diana T. Reyes-Castillo,<sup>[a]</sup> Joelis Rodríguez-Hernández,<sup>[b]</sup> Milan Gembicky,<sup>[c]</sup> Eduardo Menéndez-Proupin<sup>[d]</sup> and Diego Solis-Ibarra<sup>[a]\*</sup>

[a] Laboratorio de Fisicoquímica y Reactividad de Superficies (LaFReS), Instituto de Investigaciones en Materiales, Universidad Nacional Autónoma de México, CU, Coyoacán, 04510. Ciudad de México, México. E-mail: [diego.solis@unam.mx](mailto:diego.solis@unam.mx)

[b] Centro de Investigación en Química Aplicada (CIQA)  
Bldv. Enrique Reyna Hermosillo, No. 140, Saltillo, Coahuila 25294, México.

[c] Department of Chemistry and Biochemistry, University of California  
San Diego, 9500 Gilman Drive, La Jolla, California 92093, United States.

[d] Grupo de Modelación de Materiales, Departamento de Física, Facultad de Ciencias, Universidad de Chile, Las Palmeras, 3425, Ñuñoa 780-0003, Santiago, Chile.

<sup>†</sup> These authors contributed equally.

\* Corresponding author: [diego.solis@unam.mx](mailto:diego.solis@unam.mx)

## Table of Contents

|                                                                  |           |
|------------------------------------------------------------------|-----------|
| <b>Computational methods .....</b>                               | <b>3</b>  |
| <b>Experimental Procedures .....</b>                             | <b>13</b> |
| <b>Material synthesis .....</b>                                  | <b>13</b> |
| <b>Material characterization .....</b>                           | <b>15</b> |
| <i>PXRD measurements .....</i>                                   | <i>15</i> |
| <i>Rietveld and Le Bail refinements .....</i>                    | <i>16</i> |
| <i>Thermogravimetric and differential scanning results .....</i> | <i>21</i> |
| <i>Stability towards humidity and light irradiation .....</i>    | <i>23</i> |
| <i>Photoluminescence and absorbance measurements .....</i>       | <i>25</i> |
| <b>References .....</b>                                          | <b>26</b> |

## Computational Methods

First principle calculations were carried out by using density functional theory (DFT) with a plane-wave basis set and projector augmented wave (PAW)<sup>[1]</sup> method as implemented in Vienna ab initio simulation package (VASP).<sup>[2,3]</sup> For relative thermodynamic stability we get the energy of perovskites with the full relaxed structure optimizations using generalized gradient approximation (GGA) formulated by Perdew, Burke, and Ernzerhof in the modified form (PBEsol).<sup>[4]</sup> To perform DFT calculations, the primitive cell was obtained, this primitive cell was achieved using SeeK-path code.<sup>[5]</sup> An energy cutoff of 330 eV and a 4 x 4 x 2 grid of k-points for Brillouin zone were implemented without symmetric restrictions until the maximum force and energy per atom is  $< 0.01 \text{ eV } \text{\AA}^{-1}$  and 10 meV, respectively. Our first principle calculations were implemented using the previously reported manganese and copper perovskites ( $\text{Cs}_4\text{MnSb}_2\text{Cl}_{12}$  and  $\text{Cs}_4\text{CuSb}_2\text{Cl}_{12}$ ) as the starting point.<sup>[6,7]</sup> For all the optimizations, we considered spin configurations to those perovskites that contained transition metals with incomplete *d* levels, we considered as a ferromagnetic structure. To obtain the relative thermodynamic stability, all compounds, both products and reagents were optimized as a ferromagnetic configuration. For the relative thermodynamical stability studies, a search for suitable decomposition materials was done at the Materials Project.<sup>[8]</sup> Detailed information for the decomposition products considering for every material can be found in table S2. When more than one possible decomposition pathway was available, both were calculated and the one with a lower energy was used for analysis.

For the possible stable compounds, as identified with the computational method described above and in the main manuscript (Figure 3), their electronic structure was also calculated. For:  $\text{Cs}_4\text{FeSb}_2\text{Cl}_{12}$ ,  $\text{Cs}_4\text{CrSb}_2\text{Cl}_{12}$ ,  $\text{Rb}_4\text{CrSb}_2\text{Cl}_{12}$ ,  $\text{Rb}_4\text{MnSb}_2\text{Cl}_{12}$ ,  $\text{Rb}_4\text{CuSb}_2\text{Cl}_{12}$ ,  $\text{Cs}_4\text{CdSb}_2\text{Cl}_{12}$ ,  $\text{Cs}_4\text{MnBi}_2\text{Cl}_{12}$ ,  $\text{Cs}_4\text{FeBi}_2\text{Cl}_{12}$  and  $\text{Cs}_4\text{CdBi}_2\text{Cl}_{12}$ , the band structures and density of states (DOS) are shown in Figures S1 and S2. The DOS and band diagrams were obtained with the HSE06 functional,<sup>[9,10]</sup> starting from structures that were previously relaxed using the same HSE06 functional. Reciprocal coordinates of the *k* points used in the band structure are shown in table S3.

Due the presence of unpaired electrons and partially filled d-shells, it was necessary to consider magnetic configurations, which are: non-magnetic (NM), ferromagnetic (FM) and antiferromagnetic (AFM). Spin configuration that was chosen for AFM is the most stable configuration obtained in previous works.<sup>[7,11]</sup> For cadmium compounds only the non-magnetic configuration was considered. Being the AFM, the most stable configuration for all compounds with unpaired electrons, (table S4).

First, the structures were optimized, using HSE06 functional, without considering the magnetic configuration using the primitive cell, then it was optimized with the desired magnetic configuration, until the maximum force and energy per atom were  $< 0.01 \text{ eV } \text{\AA}^{-1}$  and 10 meV, respectively. For primitive cells, we implemented a grid of k-points for Brillouin zone of  $4 \times 4 \times 2$ . For AFM configuration, a  $2 \times 2 \times 1$  supercell was created for each compound, for this supercell we used a  $2 \times 2 \times 2$  grid of k-points for Brillouin zone, and for both structures, an energy cutoff of 330 eV was used during the structure optimization process.

For the bismuth compounds, the spin orbit coupling was included in the band structure calculation. For manganese and iron compounds, the calculations were performed with an AFM configuration. Table S5 shown the results with non-SOC and SOC calculations for bismuth compounds.

**Table S1.** Optimized lattice parameters for 25-perovskites with the form  $A_4M^{II}M^{III}_2Cl_{12}$  using primitive cell using PBEsol functional.

| Material |                 |                  | Calculated lattice parameters |          |          |          |          |
|----------|-----------------|------------------|-------------------------------|----------|----------|----------|----------|
| A        | M <sup>II</sup> | M <sup>III</sup> | a = b                         | c        | $\alpha$ | $\beta$  | $\gamma$ |
| Cs       | Ti              | Sb               | 7.438                         | 12.849   | 73.198   | 106.788  | 120.064  |
|          | V               |                  | 7.412                         | 12.755   | 73.109   | 106.892  | 120.008  |
|          | Cr              |                  | 7.422                         | 12.743   | 73.008   | 106.992  | 120.048  |
|          | Mn              |                  | 7.438                         | 12.808   | 73.120   | 106.871  | 119.995  |
|          | Fe              |                  | 7.394                         | 12.746   | 73.104   | 106.896  | 119.880  |
|          | Co              |                  | 7.365                         | 12.691   | 73.208   | 106.793  | 120.034  |
|          | Cu              |                  | 7.377                         | 12.814   | 71.481   | 108.519  | 121.179  |
|          | Zn              |                  | 7.422                         | 12.755   | 73.077   | 106.923  | 120.006  |
|          | Cd              |                  | 7.524                         | 12.942   | 73.106   | 106.894  | 120.007  |
| Rb       | Ti              | Sb               | 7.296                         | 12.682   | 74.594   | 105.254  | 120.664  |
|          | V               |                  | 7.301                         | 12.607   | 73.181   | 106.818  | 120.004  |
|          | Cr              |                  | 7.317                         | 12.574   | 73.083   | 106.917  | 120.009  |
|          | Mn              |                  | 7.327                         | 12.657   | 73.177   | 106.823  | 120.000  |
|          | Fe              |                  | 7.285                         | 12.592   | 73.108   | 106.892  | 119.885  |
|          | Co              |                  | 7.265                         | 12.518   | 73.132   | 106.869  | 120.003  |
|          | Cu              |                  | 7.206                         | 12.443   | 73.382   | 106.618  | 119.869  |
|          | Zn              |                  | 7.323                         | 12.580   | 73.081   | 106.919  | 120.002  |
|          | Cd              |                  | 7.442                         | 12.815   | 73.090   | 106.910  | 120.035  |
| Cs       | Ti              | Bi               | 7.45754                       | 12.93239 | 73.2541  | 106.7413 | 119.9877 |
|          | V               |                  | 7.4182                        | 12.87281 | 73.2557  | 106.7431 | 119.9963 |
|          | Cr              |                  | 7.43077                       | 12.87039 | 73.2242  | 106.7773 | 120.0018 |
|          | Mn              |                  | 7.44602                       | 12.9172  | 73.2475  | 106.7523 | 119.9967 |
|          | Fe              |                  | 7.40859                       | 12.8552  | 73.2454  | 106.744  | 119.9945 |
|          | Co              |                  | 7.39183                       | 12.80159 | 73.229   | 106.7686 | 120.0002 |
|          | Ni              |                  | 7.36539                       | 12.76899 | 73.2273  | 106.7691 | 119.988  |
|          | Cu              |                  | 7.36976                       | 12.7667  | 73.3265  | 106.6721 | 119.9353 |
|          | Zn              |                  | 7.43106                       | 12.87007 | 73.2287  | 106.7669 | 119.9938 |
|          | Cd              |                  | 7.53385                       | 13.05844 | 73.2434  | 106.7534 | 119.9988 |

**Table S2.** Decomposition pathways for  $\text{Cs}_4\text{M}^{\text{II}}\text{Sb}_2\text{X}_{12}$  and  $\text{Rb}_4\text{M}^{\text{II}}\text{Sb}_2\text{X}_{12}$  and calculated energies considering non-magnetic (NM) and ferromagnetic (FM) configurations for the corresponding transition-metal material.

| Perovskite                                           | Decomposition pathway                                                                                                               | $\Delta H_{\text{des}}$<br>(meV/atom) |         |
|------------------------------------------------------|-------------------------------------------------------------------------------------------------------------------------------------|---------------------------------------|---------|
|                                                      |                                                                                                                                     | NM                                    | FM      |
| <b>Cs<sub>4</sub>TiSb<sub>2</sub>Cl<sub>12</sub></b> | CsTiCl <sub>3</sub> + Cs <sub>3</sub> Sb <sub>2</sub> Cl <sub>9</sub>                                                               | -41.658                               | -25.276 |
|                                                      | TiCl <sub>2</sub> + CsCl + Cs <sub>3</sub> Sb <sub>2</sub> Cl <sub>9</sub>                                                          | -36.446                               | -13.021 |
|                                                      | CsTiCl <sub>3</sub> + 3 CsCl + 2 SbCl <sub>3</sub>                                                                                  | 35.623                                | 52.005  |
|                                                      | TiCl <sub>2</sub> + 2 SbCl <sub>3</sub> + 4 CsCl                                                                                    | 40.836                                | 64.261  |
| <b>Cs<sub>4</sub>VSb<sub>2</sub>Cl<sub>12</sub></b>  | CsVCl <sub>3</sub> + Cs <sub>3</sub> Sb <sub>2</sub> Cl <sub>9</sub>                                                                | -54.079                               | -9.761  |
|                                                      | VCl <sub>2</sub> + CsCl + Cs <sub>3</sub> Sb <sub>2</sub> Cl <sub>9</sub>                                                           | -47.863                               | 31.421  |
|                                                      | CsVCl <sub>3</sub> + 3 CsCl + 2 SbCl <sub>3</sub>                                                                                   | 23.023                                | 67.521  |
|                                                      | VCl <sub>2</sub> + 2 SbCl <sub>3</sub> + 4 CsCl                                                                                     | 29.418                                | 108.703 |
| <b>Cs<sub>4</sub>CrSb<sub>2</sub>Cl<sub>12</sub></b> | $\frac{1}{2}$ Cs <sub>2</sub> CrCl <sub>4</sub> + $\frac{1}{2}$ CrCl <sub>2</sub> + Cs <sub>3</sub> Sb <sub>2</sub> Cl <sub>9</sub> | -17.572                               | 5.600   |
|                                                      | CrCl <sub>2</sub> + CsCl + Cs <sub>3</sub> Sb <sub>2</sub> Cl <sub>9</sub>                                                          | -26.987                               | 20.799  |
|                                                      | Cs <sub>2</sub> CrCl <sub>4</sub> + 2 SbCl <sub>3</sub> + 2 CsCl                                                                    | 69.123                                | 67.683  |
|                                                      | $\frac{1}{2}$ Cs <sub>2</sub> CrCl <sub>4</sub> + $\frac{1}{2}$ CrCl <sub>2</sub> + 2 SbCl <sub>3</sub> + 3 CsCl                    | 59.709                                | 82.882  |
|                                                      | CrCl <sub>2</sub> + 2 SbCl <sub>3</sub> + 4 CsCl                                                                                    | 50.294                                | 98.080  |
| <b>Cs<sub>4</sub>MnSb<sub>2</sub>Cl<sub>12</sub></b> | CsMnCl <sub>3</sub> + Cs <sub>3</sub> Sb <sub>2</sub> Cl <sub>9</sub>                                                               | -23.863                               | 4.712   |
|                                                      | MnCl <sub>2</sub> + CsCl + Cs <sub>3</sub> Sb <sub>2</sub> Cl <sub>9</sub>                                                          | -16.689                               | 24.293  |
|                                                      | CsMnCl <sub>3</sub> + 3 CsCl + 2 SbCl <sub>3</sub>                                                                                  | 53.418                                | 81.993  |
|                                                      | MnCl <sub>2</sub> + 2 SbCl <sub>3</sub> + 4 CsCl                                                                                    | 60.592                                | 101.575 |
| <b>Cs<sub>4</sub>FeSb<sub>2</sub>Cl<sub>12</sub></b> | CsFeCl <sub>3</sub> + Cs <sub>3</sub> Sb <sub>2</sub> Cl <sub>9</sub>                                                               | -21.411                               | 28.886  |
|                                                      | FeCl <sub>2</sub> + CsCl + Cs <sub>3</sub> Sb <sub>2</sub> Cl <sub>9</sub>                                                          | -13.300                               | 36.997  |
|                                                      | CsFeCl <sub>3</sub> + 3 CsCl + 2 SbCl <sub>3</sub>                                                                                  | 55.870                                | 106.167 |
|                                                      | FeCl <sub>2</sub> + 2 SbCl <sub>3</sub> + 4 CsCl                                                                                    | 121.564                               | 114.277 |
| <b>Cs<sub>4</sub>CoSb<sub>2</sub>Cl<sub>12</sub></b> | CsCoCl <sub>3</sub> + Cs <sub>3</sub> Sb <sub>2</sub> Cl <sub>9</sub>                                                               | -7.153                                | -12.020 |
|                                                      | CoCl <sub>2</sub> + CsCl + Cs <sub>3</sub> Sb <sub>2</sub> Cl <sub>9</sub>                                                          | 5.489                                 | 17.506  |
|                                                      | CsCoCl <sub>3</sub> + 3 CsCl + 2 SbCl <sub>3</sub>                                                                                  | 70.127                                | 65.260  |
|                                                      | CoCl <sub>2</sub> + 2 SbCl <sub>3</sub> + 4 CsCl                                                                                    | 82.770                                | 94.787  |
| <b>Cs<sub>4</sub>CuSb<sub>2</sub>Cl<sub>12</sub></b> | CsCuCl <sub>3</sub> + Cs <sub>3</sub> Sb <sub>2</sub> Cl <sub>9</sub>                                                               | 17.644                                | 12.670  |
|                                                      | CuCl <sub>2</sub> + CsCl + Cs <sub>3</sub> Sb <sub>2</sub> Cl <sub>9</sub>                                                          | 28.740                                | 27.350  |
|                                                      | CsCuCl <sub>3</sub> + 3 CsCl + 2 SbCl <sub>3</sub>                                                                                  | 94.926                                | 89.952  |
|                                                      | CuCl <sub>2</sub> + 2 SbCl <sub>3</sub> + 4 CsCl                                                                                    | 106.021                               | 104.641 |
| <b>Cs<sub>4</sub>ZnSb<sub>2</sub>Cl<sub>12</sub></b> | $\frac{1}{2}$ Cs <sub>2</sub> ZnCl <sub>4</sub> + $\frac{1}{2}$ ZnCl <sub>2</sub> + Cs <sub>3</sub> Sb <sub>2</sub> Cl <sub>9</sub> | -7.191                                |         |
|                                                      | ZnCl <sub>2</sub> + CsCl + Cs <sub>3</sub> Sb <sub>2</sub> Cl <sub>9</sub>                                                          | 10.397                                |         |
|                                                      | Cs <sub>2</sub> ZnCl <sub>4</sub> + 2 SbCl <sub>3</sub> + 2 CsCl                                                                    | 52.503                                |         |
|                                                      | ZnCl <sub>2</sub> + 2 SbCl <sub>3</sub> + 4 CsCl                                                                                    | 87.678                                |         |
| <b>Cs<sub>4</sub>CdSb<sub>2</sub>Cl<sub>12</sub></b> | CsCdCl <sub>3</sub> + Cs <sub>3</sub> Sb <sub>2</sub> Cl <sub>9</sub>                                                               | 1.395                                 |         |
|                                                      | CdCl <sub>2</sub> + CsCl + Cs <sub>3</sub> Sb <sub>2</sub> Cl <sub>9</sub>                                                          | 15.376                                |         |
|                                                      | CsCdCl <sub>3</sub> + 3 CsCl + 2 SbCl <sub>3</sub>                                                                                  | 78.677                                |         |
|                                                      | CdCl <sub>2</sub> + 2 SbCl <sub>3</sub> + 4 CsCl                                                                                    | 92.658                                |         |
| <b>Rb<sub>4</sub>CuSb<sub>2</sub>Cl<sub>12</sub></b> | RbCuCl <sub>3</sub> + Rb <sub>3</sub> Sb <sub>2</sub> Cl <sub>9</sub>                                                               | 23.137                                | 18.993  |
|                                                      | $\frac{1}{2}$ Rb <sub>2</sub> CuCl <sub>4</sub> + $\frac{1}{2}$ CuCl <sub>2</sub> + Rb <sub>3</sub> Sb <sub>2</sub> Cl <sub>9</sub> | 21.213                                | 20.211  |
|                                                      | CuCl <sub>2</sub> + RbCl + Rb <sub>3</sub> Sb <sub>2</sub> Cl <sub>9</sub>                                                          | 27.276                                | 27.275  |
|                                                      | Rb <sub>2</sub> CuCl <sub>4</sub> + 2 SbCl <sub>3</sub> + 2 RbCl                                                                    | 60.691                                | 58.466  |
|                                                      | RbCuCl <sub>3</sub> + 2 SbCl <sub>3</sub> + 3 RbCl                                                                                  | 68.458                                | 64.314  |
|                                                      | CuCl <sub>2</sub> + 2 SbCl <sub>3</sub> + 4 RbCl                                                                                    | 72.596                                | 72.596  |
| <b>Rb<sub>4</sub>TiSb<sub>2</sub>Cl<sub>12</sub></b> | RbTiCl <sub>3</sub> + Rb <sub>3</sub> Sb <sub>2</sub> Cl <sub>9</sub>                                                               | -40.902                               | -11.880 |
|                                                      | TiCl <sub>2</sub> + RbCl + Rb <sub>3</sub> Sb <sub>2</sub> Cl <sub>9</sub>                                                          | -42.752                               | -6.955  |

|                                                      |                                                                                                        |         |         |
|------------------------------------------------------|--------------------------------------------------------------------------------------------------------|---------|---------|
|                                                      | $\text{RbTiCl}_3 + 2 \text{SbCl}_3 + 3 \text{RbCl}$                                                    | 4.418   | 33.440  |
|                                                      | $\text{TiCl}_2 + 2 \text{SbCl}_3 + 4 \text{RbCl}$                                                      | 2.568   | 38.365  |
| <b>Rb<sub>4</sub>VSb<sub>2</sub>Cl<sub>12</sub></b>  | $\text{RbVCl}_3 + \text{Rb}_3\text{Sb}_2\text{Cl}_9$                                                   | -53.087 | -9.136  |
|                                                      | $\text{VCl}_2 + \text{RbCl} + \text{Rb}_3\text{Sb}_2\text{Cl}_9$                                       | -51.602 | 26.401  |
|                                                      | $\text{RbVCl}_3 + 2 \text{SbCl}_3 + 3 \text{RbCl}$                                                     | -7.767  | 26.184  |
|                                                      | $\text{VCl}_2 + 2 \text{SbCl}_3 + 4 \text{RbCl}$                                                       | -6.282  | 71.722  |
| <b>Rb<sub>4</sub>CrSb<sub>2</sub>Cl<sub>12</sub></b> | $\frac{1}{2} \text{Rb}_2\text{CrCl}_4 + \frac{1}{2} \text{CrCl}_2 + \text{Rb}_3\text{Sb}_2\text{Cl}_9$ | -19.998 | 4.109   |
|                                                      | $\text{RbCrCl}_3 + \text{Rb}_3\text{Sb}_2\text{Cl}_9$                                                  | -67.253 | 10.841  |
|                                                      | $\text{CrCl}_2 + \text{RbCl} + \text{Rb}_3\text{Sb}_2\text{Cl}_9$                                      | -28.604 | 15.481  |
|                                                      | $\text{Rb}_2\text{CrCl}_4 + 2 \text{SbCl}_3 + 2 \text{RbCl}$                                           | 33.928  | 38.057  |
|                                                      | $\text{RbCrCl}_3 + 2 \text{SbCl}_3 + 3 \text{RbCl}$                                                    | -21.933 | 56.161  |
|                                                      | $\text{CrCl}_2 + 2 \text{SbCl}_3 + 4 \text{RbCl}$                                                      | 16.716  | 60.802  |
| <b>Rb<sub>4</sub>MnSb<sub>2</sub>Cl<sub>12</sub></b> | $\text{RbMnCl}_3 + \text{Rb}_3\text{Sb}_2\text{Cl}_9$                                                  | -2.798  | 8.803   |
|                                                      | $\text{Rb}_2\text{MnCl}_4 + \text{MnCl}_2 + \text{Rb}_3\text{Sb}_2\text{Cl}_9$                         | -7.179  | 9.852   |
|                                                      | $\text{MnCl}_2 + \text{RbCl} + \text{Rb}_3\text{Sb}_2\text{Cl}_9$                                      | -16.263 | 17.751  |
|                                                      | $\text{Rb}_2\text{MnCl}_4 + 2 \text{SbCl}_3 + 2 \text{RbCl}$                                           | 47.225  | 47.274  |
|                                                      | $\text{RbMnCl}_3 + 2 \text{SbCl}_3 + 3 \text{RbCl}$                                                    | 42.522  | 54.123  |
|                                                      | $\text{MnCl}_2 + 2 \text{SbCl}_3 + 4 \text{RbCl}$                                                      | 29.057  | 63.071  |
| <b>Rb<sub>4</sub>FeSb<sub>2</sub>Cl<sub>12</sub></b> | $\text{RbFeCl}_3 + \text{Rb}_3\text{Sb}_2\text{Cl}_9$                                                  | -13.848 | -10.359 |
|                                                      | $\text{FeCl}_2 + \text{RbCl} + \text{Rb}_3\text{Sb}_2\text{Cl}_9$                                      | -11.172 | 31.919  |
|                                                      | $\text{RbFeCl}_3 + 2 \text{SbCl}_3 + 3 \text{RbCl}$                                                    | 31.472  | 34.961  |
|                                                      | $\text{FeCl}_2 + 2 \text{SbCl}_3 + 4 \text{RbCl}$                                                      | 34.148  | 77.240  |
| <b>Rb<sub>4</sub>CoSb<sub>2</sub>Cl<sub>12</sub></b> | $\text{RbCoCl}_3 + \text{Rb}_3\text{Sb}_2\text{Cl}_9$                                                  | -0.553  | -7.828  |
|                                                      | $\text{CoCl}_2 + \text{RbCl} + \text{Rb}_3\text{Sb}_2\text{Cl}_9$                                      | 7.812   | 15.233  |
|                                                      | $\frac{1}{2} \text{Rb}_2\text{CoCl}_4 + \frac{1}{2} \text{CoCl}_2 + \text{Rb}_3\text{Sb}_2\text{Cl}_9$ | 25.002  | 18.391  |
|                                                      | $\text{RbCoCl}_3 + 2 \text{SbCl}_3 + 3 \text{RbCl}$                                                    | 44.768  | 37.492  |
|                                                      | $\text{CoCl}_2 + 2 \text{SbCl}_3 + 4 \text{RbCl}$                                                      | 53.133  | 60.554  |
|                                                      | $\text{Rb}_2\text{CoCl}_4 + 2 \text{SbCl}_3 + 2 \text{RbCl}$                                           | 87.613  | 66.869  |
| <b>Rb<sub>4</sub>CuSb<sub>2</sub>Cl<sub>12</sub></b> | $\text{RbCuCl}_3 + \text{Rb}_3\text{Sb}_2\text{Cl}_9$                                                  | 23.137  | 18.993  |
|                                                      | $\frac{1}{2} \text{Rb}_2\text{CuCl}_4 + \frac{1}{2} \text{CuCl}_2 + \text{Rb}_3\text{Sb}_2\text{Cl}_9$ | 21.213  | 20.211  |
|                                                      | $\text{CuCl}_2 + \text{RbCl} + \text{Rb}_3\text{Sb}_2\text{Cl}_9$                                      | 27.276  | 27.275  |
|                                                      | $\text{Rb}_2\text{CuCl}_4 + 2 \text{SbCl}_3 + 2 \text{RbCl}$                                           | 60.691  | 58.466  |
|                                                      | $\text{RbCuCl}_3 + 2 \text{SbCl}_3 + 3 \text{RbCl}$                                                    | 68.458  | 64.314  |
|                                                      | $\text{CuCl}_2 + 2 \text{SbCl}_3 + 4 \text{RbCl}$                                                      | 72.596  | 72.596  |
| <b>Rb<sub>4</sub>ZnSb<sub>2</sub>Cl<sub>12</sub></b> | $\frac{1}{2} \text{Rb}_2\text{ZnCl}_4 + \frac{1}{2} \text{ZnCl}_2 + \text{Rb}_3\text{Sb}_2\text{Cl}_9$ | -7.294  |         |
|                                                      | $\text{ZnCl}_2 + \text{RbCl} + \text{Rb}_3\text{Sb}_2\text{Cl}_9$                                      | 5.587   |         |
|                                                      | $\text{Rb}_2\text{ZnCl}_4 + 2 \text{SbCl}_3 + 2 \text{RbCl}$                                           | 25.145  |         |
|                                                      | $\text{ZnCl}_2 + 2 \text{SbCl}_3 + 4 \text{RbCl}$                                                      | 50.907  |         |
| <b>Rb<sub>4</sub>CdSb<sub>2</sub>Cl<sub>12</sub></b> | $\text{RbCdCl}_3 + \text{Rb}_3\text{Sb}_2\text{Cl}_9$                                                  | -5.700  |         |
|                                                      | $\text{CdCl}_2 + \text{RbCl} + \text{Rb}_3\text{Sb}_2\text{Cl}_9$                                      | 5.569   |         |
|                                                      | $\text{RbCdCl}_3 + 2 \text{SbCl}_3 + 3 \text{RbCl}$                                                    | 39.620  |         |
|                                                      | $\text{CdCl}_2 + 2 \text{SbCl}_3 + 4 \text{RbCl}$                                                      | 50.890  |         |
| <b>Cs<sub>4</sub>TiBi<sub>2</sub>Cl<sub>12</sub></b> | $\text{CsTiCl}_3 + \text{Cs}_3\text{Bi}_2\text{Cl}_9$                                                  | -45.018 | -27.011 |
|                                                      | $\text{TiCl}_2 + \text{CsCl} + \text{Cs}_3\text{Bi}_2\text{Cl}_9$                                      | -39.806 | -14.755 |
|                                                      | $\text{CsTiCl}_3 + 2 \text{BiCl}_3 + 3 \text{CsCl}$                                                    | 29.263  | 47.270  |
|                                                      | $\text{TiCl}_2 + 2 \text{BiCl}_3 + 4 \text{CsCl}$                                                      | 34.475  | 59.526  |
| <b>Cs<sub>4</sub>VBi<sub>2</sub>Cl<sub>12</sub></b>  | $\text{CsVCl}_3 + \text{Cs}_3\text{Bi}_2\text{Cl}_9$                                                   | -56.674 | -11.084 |
|                                                      | $\text{VCl}_2 + \text{CsCl} + \text{Cs}_3\text{Bi}_2\text{Cl}_9$                                       | -50.459 | 30.098  |
|                                                      | $\text{CsVCl}_3 + 2 \text{BiCl}_3 + 3 \text{CsCl}$                                                     | 17.607  | 63.197  |
|                                                      | $\text{VCl}_2 + 2 \text{BiCl}_3 + 4 \text{CsCl}$                                                       | 23.822  | 104.379 |
| <b>Cs<sub>4</sub>CrBi<sub>2</sub>Cl<sub>12</sub></b> | $\frac{1}{2} \text{Cs}_2\text{CrCl}_4 + \frac{1}{2} \text{CrCl}_2 + \text{Cs}_3\text{Bi}_2\text{Cl}_9$ | -19.672 | -0.915  |
|                                                      | $\text{CrCl}_2 + \text{CsCl} + \text{Cs}_3\text{Bi}_2\text{Cl}_9$                                      | -29.087 | 14.284  |
|                                                      | $\text{Cs}_2\text{CrCl}_4 + 2 \text{BiCl}_3 + 2 \text{CsCl}$                                           | 64.023  | 58.168  |

|                                                      |                                                                                                        |         |         |
|------------------------------------------------------|--------------------------------------------------------------------------------------------------------|---------|---------|
|                                                      | $\frac{1}{2} \text{Cs}_2\text{CrCl}_4 + \frac{1}{2} \text{CrCl}_2 + 2 \text{BiCl}_3 + 3 \text{CsCl}$   | 54.609  | 73.366  |
|                                                      | $\text{CrCl}_2 + 2 \text{SbCl}_3 + 4 \text{CsCl}$                                                      | 45.194  | 88.564  |
| <b>Cs<sub>4</sub>MnBi<sub>2</sub>Cl<sub>12</sub></b> | $\text{CsMnCl}_3 + \text{Cs}_3\text{Bi}_2\text{Cl}_9$                                                  | -26.572 | 2.388   |
|                                                      | $\text{MnCl}_2 + \text{CsCl} + \text{Cs}_3\text{Bi}_2\text{Cl}_9$                                      | -19.398 | 21.970  |
|                                                      | $\text{CsMnCl}_3 + 2 \text{BiCl}_3 + 3 \text{CsCl}$                                                    | 47.709  | 76.669  |
|                                                      | $\text{MnCl}_2 + 2 \text{BiCl}_3 + 4 \text{CsCl}$                                                      | 54.883  | 96.251  |
| <b>Cs<sub>4</sub>FeBi<sub>2</sub>Cl<sub>12</sub></b> | $\text{CsFeCl}_3 + \text{Cs}_3\text{Bi}_2\text{Cl}_9$                                                  | -25.010 | 25.822  |
|                                                      | $\text{FeCl}_2 + \text{CsCl} + \text{Cs}_3\text{Bi}_2\text{Cl}_9$                                      | -16.899 | 33.932  |
|                                                      | $\text{CsFeCl}_3 + 2 \text{BiCl}_3 + 3 \text{CsCl}$                                                    | 49.271  | 100.102 |
|                                                      | $\text{FeCl}_2 + 2 \text{BiCl}_3 + 4 \text{CsCl}$                                                      | 57.382  | 108.213 |
| <b>Cs<sub>4</sub>CoBi<sub>2</sub>Cl<sub>12</sub></b> | $\text{CsCoCl}_3 + \text{Cs}_3\text{Bi}_2\text{Cl}_9$                                                  | -16.854 | -14.941 |
|                                                      | $\text{CoCl}_2 + \text{CsCl} + \text{Cs}_3\text{Bi}_2\text{Cl}_9$                                      | -4.211  | 14.585  |
|                                                      | $\text{CsCoCl}_3 + 2 \text{BiCl}_3 + 3 \text{CsCl}$                                                    | 57.427  | 59.340  |
|                                                      | $\text{CoCl}_2 + 2 \text{BiCl}_3 + 4 \text{CsCl}$                                                      | 70.070  | 88.866  |
| <b>Cs<sub>4</sub>NiBi<sub>2</sub>Cl<sub>12</sub></b> | $\text{CsNiCl}_3 + \text{Cs}_3\text{Bi}_2\text{Cl}_9$                                                  | -7.268  | -10.297 |
|                                                      | $\text{NiCl}_2 + \text{CsCl} + \text{Cs}_3\text{Bi}_2\text{Cl}_9$                                      | 9.681   | 5.105   |
|                                                      | $\text{CsNiCl}_3 + 2 \text{BiCl}_3 + 3 \text{CsCl}$                                                    | 67.012  | 63.983  |
|                                                      | $\text{NiCl}_2 + 2 \text{BiCl}_3 + 4 \text{CsCl}$                                                      | 83.961  | 79.385  |
| <b>Cs<sub>4</sub>CuBi<sub>2</sub>Cl<sub>12</sub></b> | $\text{CsCuCl}_3 + \text{Cs}_3\text{Bi}_2\text{Cl}_9$                                                  | 2.407   | -3.347  |
|                                                      | $\text{CuCl}_2 + \text{CsCl} + \text{Cs}_3\text{Bi}_2\text{Cl}_9$                                      | 13.503  | 11.333  |
|                                                      | $\text{CsCuCl}_3 + 3 \text{CsCl} + 2 \text{BiCl}_3$                                                    | 76.688  | 70.934  |
|                                                      | $\text{CuCl}_2 + 2 \text{BiCl}_3 + 4 \text{CsCl}$                                                      | 87.784  | 85.613  |
| <b>Cs<sub>4</sub>ZnBi<sub>2</sub>Cl<sub>12</sub></b> | $\frac{1}{2} \text{Cs}_2\text{ZnCl}_4 + \frac{1}{2} \text{ZnCl}_2 + \text{Cs}_3\text{Bi}_2\text{Cl}_9$ | -8.733  |         |
|                                                      | $\text{ZnCl}_2 + \text{CsCl} + \text{Cs}_3\text{Bi}_2\text{Cl}_9$                                      | 8.855   |         |
|                                                      | $\text{Cs}_2\text{ZnCl}_4 + 2 \text{BiCl}_3 + 2 \text{CsCl}$                                           | 47.961  |         |
|                                                      | $\text{ZnCl}_2 + 2 \text{BiCl}_3 + 4 \text{CsCl}$                                                      | 83.136  |         |
| <b>Cs<sub>4</sub>CdBi<sub>2</sub>Cl<sub>12</sub></b> | $\text{CsCdCl}_3 + \text{Cs}_3\text{Bi}_2\text{Cl}_9$                                                  | 0.455   |         |
|                                                      | $\text{CdCl}_2 + \text{CsCl} + \text{Cs}_3\text{Bi}_2\text{Cl}_9$                                      | 14.436  |         |
|                                                      | $\text{CsCdCl}_3 + 3 \text{CsCl} + 2 \text{BiCl}_3$                                                    | 74.736  |         |
|                                                      | $\text{CdCl}_2 + 2 \text{BiCl}_3 + 4 \text{CsCl}$                                                      | 88.717  |         |

**Table S3.** Reciprocal coordinates of *k*-points.

| Coordinates |          |          | <i>k</i> -point |
|-------------|----------|----------|-----------------|
| <i>x</i>    | <i>y</i> | <i>z</i> |                 |
| -0.34       | 0.65     | 0.00     | C <sub>2</sub>  |
| -0.50       | 0.50     | 0.00     | Y <sub>2</sub>  |
| 0.00        | 0.00     | 0.00     | Γ               |
| -0.50       | 0.50     | 0.50     | M <sub>2</sub>  |
| -0.30       | 0.69     | 0.50     | D               |
| 0.30        | 0.30     | 0.50     | D <sub>2</sub>  |
| 0.00        | 0.00     | 0.50     | A               |
| 0.00        | 0.50     | 0.50     | L <sub>2</sub>  |
| 0.00        | 0.50     | 0.00     | V <sub>2</sub>  |

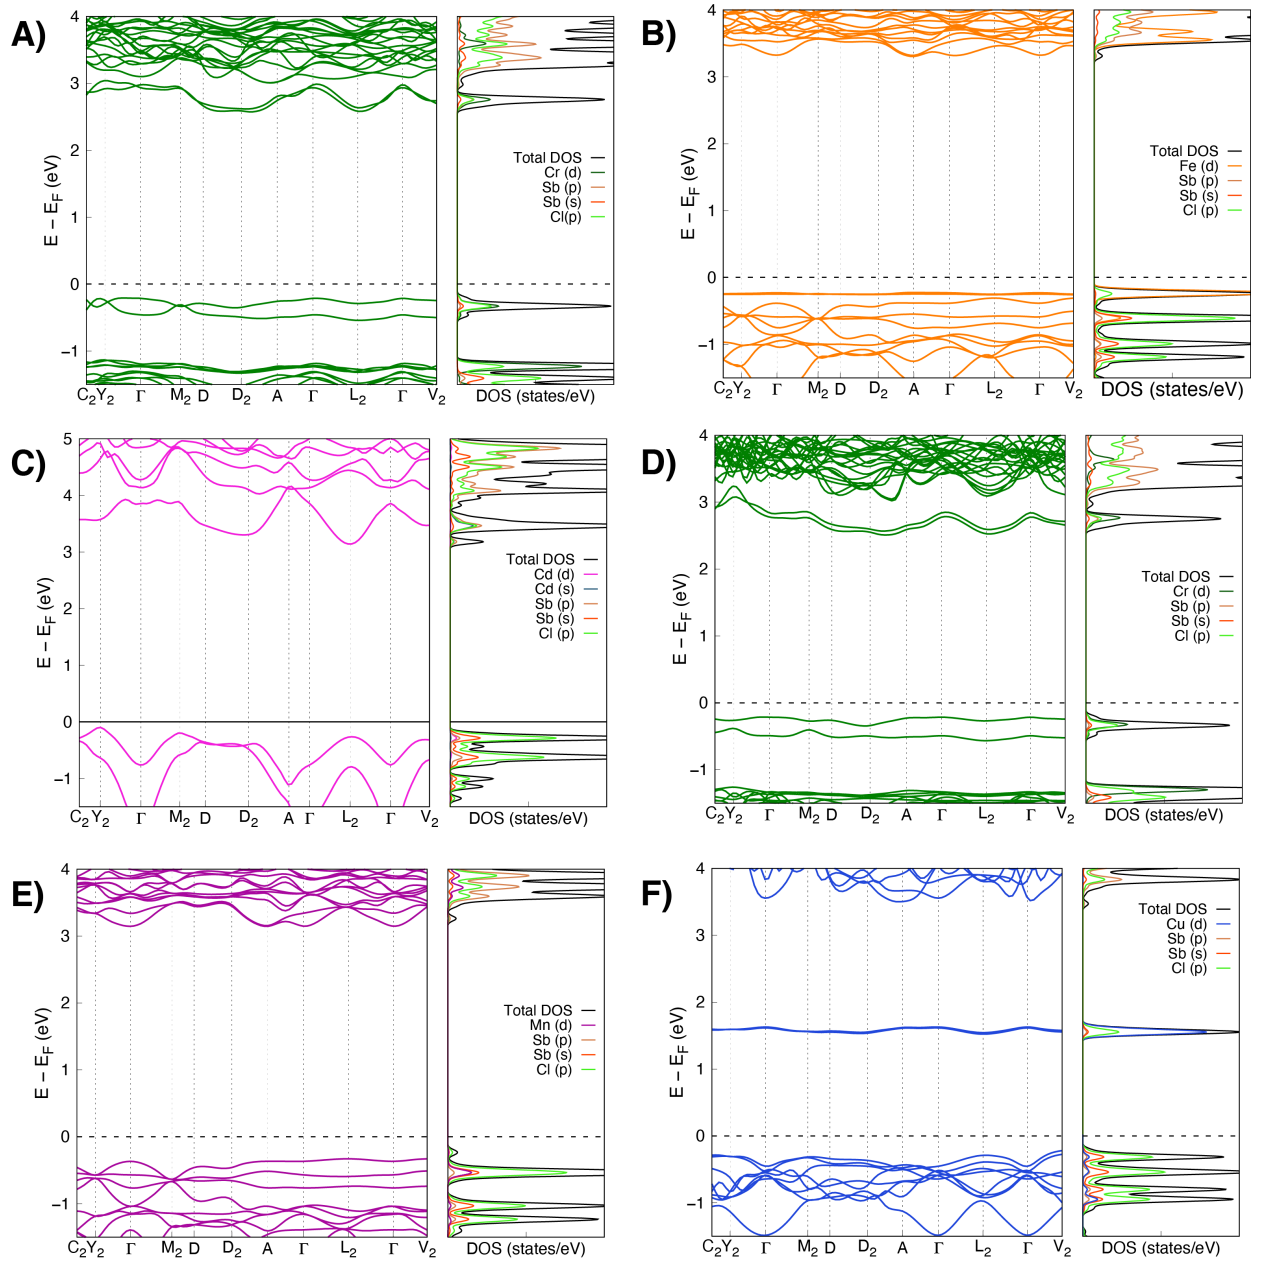

**Figure S1.** Band structure and density of states of the most stable magnetic configuration obtained for antimony compounds. A) Cs<sub>4</sub>CrSb<sub>2</sub>Cl<sub>12</sub>, B) Cs<sub>4</sub>FeSb<sub>2</sub>Cl<sub>12</sub>, C) Cs<sub>4</sub>CdSb<sub>2</sub>Cl<sub>12</sub>, D) Rb<sub>4</sub>CrSb<sub>2</sub>Cl<sub>12</sub>, E) Rb<sub>4</sub>MnSb<sub>2</sub>Cl<sub>12</sub> and F) Rb<sub>4</sub>CuSb<sub>2</sub>Cl<sub>12</sub>.

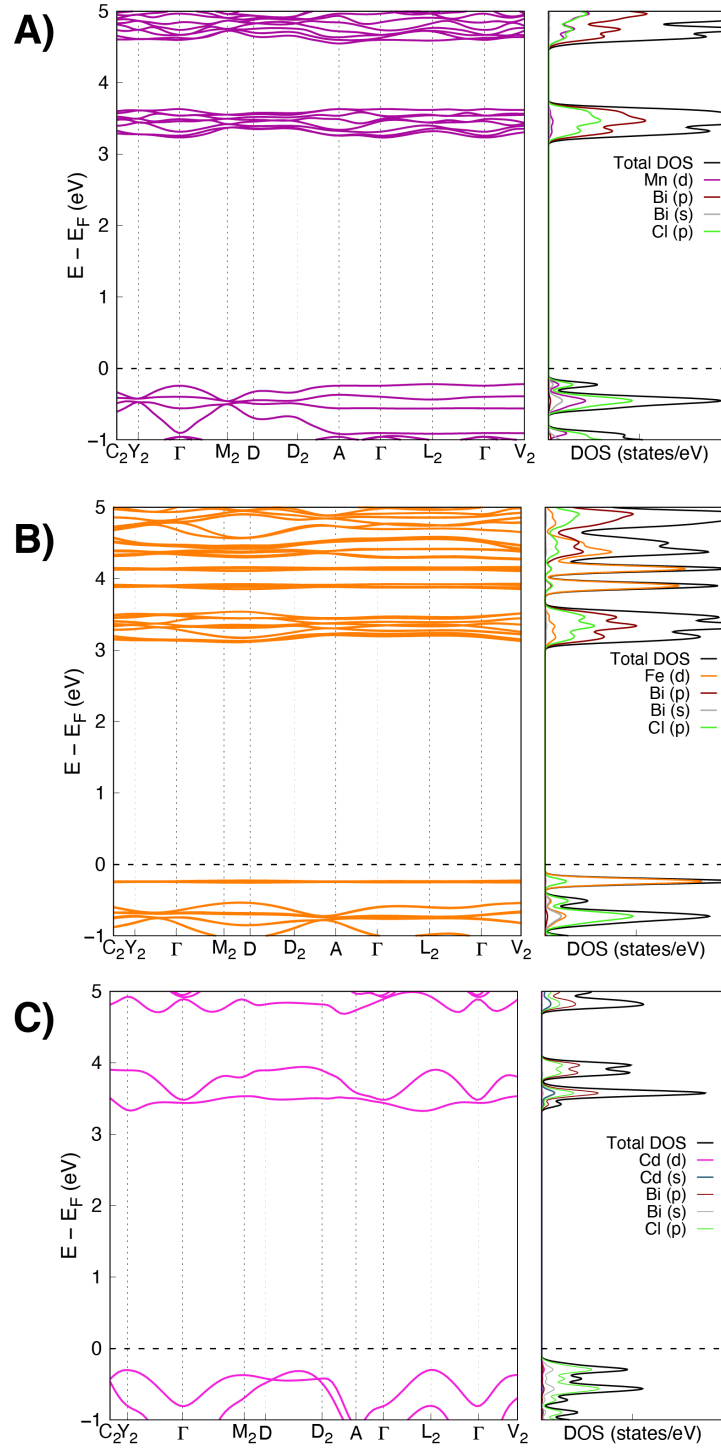

**Figure S2.** Band structure and density of states of the most stable magnetic configuration obtained for bismuth compounds including the spin orbit coupling. A)  $Cs_4FeBi_2Cl_{12}$ , B)  $Cs_4MnBi_2Cl_{12}$ , and C)  $Cs_4CdBi_2Cl_{12}$ .

**Table S4.** Band gap (eV) and relative energy per atom (meV/atom) of all magnetic configurations for the perovskites  $\text{Cs}_4\text{M}^{\text{II}}\text{Sb}_2\text{Cl}_{12}$ ,  $\text{Rb}_4\text{M}^{\text{II}}\text{Sb}_2\text{Cl}_{12}$  and  $\text{Cs}_4\text{M}^{\text{II}}\text{Bi}_2\text{Cl}_{12}$ .

| Material     |                        |                         | Magnetic configuration | Relative energy per atom (meV/atom) |
|--------------|------------------------|-------------------------|------------------------|-------------------------------------|
| $\text{A}^+$ | $\text{M}^{\text{II}}$ | $\text{M}^{\text{III}}$ |                        |                                     |
| Cs           | Sb                     | Cr                      | NM                     | 0                                   |
|              |                        |                         | FM                     | -161.153                            |
|              |                        |                         | AFM                    | -161.269                            |
|              |                        | Fe                      | NM                     | 0                                   |
|              |                        |                         | FM                     | -107.739                            |
|              |                        |                         | AFM                    | -111.081                            |
|              |                        | Cd                      | -                      | -                                   |
|              |                        | Cr                      | NM                     | 0                                   |
|              |                        |                         | FM                     | -156.549                            |
|              |                        |                         | AFM                    | -156.577                            |
| Rb           | Sb                     | Mn                      | NM                     | 0                                   |
|              |                        |                         | FM                     | -243.111                            |
|              |                        |                         | AFM                    | -243.432                            |
|              |                        | Cu                      | NM                     | 0                                   |
|              |                        |                         | FM                     | -24.856                             |
|              |                        |                         | AFM                    | -25.741                             |
|              |                        | Cr                      | NM                     | 0                                   |
|              |                        |                         | FM                     | -108.789                            |
|              |                        |                         | AFM                    | -109.702                            |
| Cs           | Bi                     | Fe                      | NM                     | 0                                   |
|              |                        |                         | FM                     | -108.789                            |
|              |                        |                         | AFM                    | -109.702                            |
|              |                        | Mn                      | NM                     | 0                                   |
|              |                        |                         | FM                     | -251.940                            |
|              |                        |                         | AFM                    | -253.343                            |
|              |                        | Cd                      | -                      | -                                   |
|              |                        | Fe                      | NM                     | 0                                   |
|              |                        |                         | FM                     | -108.789                            |
|              |                        |                         | AFM                    | -109.702                            |

**Table S5.** Band gap (eV) for the perovskites  $\text{Cs}_4\text{M}^{\text{II}}\text{Sb}_2\text{Cl}_{12}$ ,  $\text{Rb}_4\text{M}^{\text{II}}\text{Sb}_2\text{Cl}_{12}$  and  $\text{Cs}_4\text{M}^{\text{II}}\text{Bi}_2\text{Cl}_{12}$ . For bismuth compounds, it shown the non-SOC and SOC band gap calculations.

| Material       |                 |                  | Band gap (eV) |        |
|----------------|-----------------|------------------|---------------|--------|
| A <sup>+</sup> | M <sup>II</sup> | M <sup>III</sup> | Indirect      | Direct |
| Cs             | Sb              | Cr               | 2.784         | 2.874  |
|                |                 | Fe               | 3.551         | 3.552  |
|                |                 | Cd               | 3.237         | 3.404  |
| Rb             |                 | Cr               | 2.725         | 2.788  |
|                |                 | Mn               | -             | 3.512  |
|                |                 | Cu               | 1.742         | 1.774  |
|                |                 |                  | Band gap (eV) |        |
|                |                 |                  | Non-SOC       | SOC    |
| Cs             | Bi              | Fe               | 3.824         | 3.327  |
|                |                 | Mn               | 4.114         | 3.455  |
|                |                 | Cd               | 3.958         | 3.636  |

## Experimental Procedures

### Material synthesis

#### General Considerations

Reagents were purchased from commercial vendors and used as received. Solvents were of reagent grade or higher purity. Methanol was HPLC quality and dried and degassed using a JC Meyer Solvent Purification system.

- **Cs<sub>4</sub>CdSb<sub>2</sub>Cl<sub>12</sub>** was precipitated by adding 0.337 g of CsCl (2.0 mmol) to a solution of Sb<sub>2</sub>O<sub>3</sub> (0.146 g, 0.5 mmol) and CdCl<sub>2</sub> (0.092 g, 0.5 mmol) in 2.5 mL of 36% HCl.
- **Cs<sub>4</sub>CdBi<sub>2</sub>Cl<sub>12</sub>** was precipitated by adding 0.337 g of CsCl (2.0 mmol) to a solution of BiCl<sub>3</sub> (0.315 g, 1.0 mmol) and CdCl<sub>2</sub> (0.092 g, 0.5 mmol) in 2.5 mL of 36% HCl.
- **Cs<sub>4</sub>MnBi<sub>2</sub>Cl<sub>12</sub>** was precipitated by adding 0.337 g of CsCl (2.0 mmol) to a solution of BiCl<sub>3</sub> (0.315 g, 1.0 mmol) and MnCl<sub>2</sub> (0.064 g, 0.5 mmol) in 2.5 mL of 36% HCl.

The precipitates were left under constant stirring for 12 hours. Then, they were thoroughly washed with diethyl ether three times to ensure that no HCl residue is left. Finally, they were dried at 120 °C for 5 hours. Cadmium compounds: Cs<sub>4</sub>CdSb<sub>2</sub>Cl<sub>12</sub> and Cs<sub>4</sub>CdBi<sub>2</sub>Cl<sub>12</sub>; were obtained as white microcrystalline powders, respectively; whereas Cs<sub>4</sub>MnBi<sub>2</sub>Cl<sub>12</sub> was obtained as a pale pink microcrystalline powder.

The Rb compounds were synthesized according to the following procedures:

- **Rb<sub>4</sub>CuSb<sub>2</sub>Cl<sub>12</sub>** Inside a nitrogen-filled glovebox, a 5 mL methanolic solution containing 48.4 mg (0.1 mmol) of RbCl, was mixed with a 0.5 mL of solution containing 45.6 mg (0.2 mmol) of SbCl<sub>3</sub> and 13.4 mg of CuCl<sub>2</sub> (0.1 mmol) in anhydrous methanol. The resulting solution was then evaporated to dryness at 80 °C outside the glovebox, making sure that all volatiles were removed. A black, microcrystalline precipitate was obtained upon complete evaporation of the volatiles.

- **Rb<sub>4</sub>MnSb<sub>2</sub>Cl<sub>12</sub>** was obtained by adding a 5 mL methanol solution with 48.4 mg (0.1 mmol) of RbCl, into a 0.5 mL methanol solution with 45.6 mg (0.2 mmol) of SbCl<sub>3</sub> and 12.6 mg of MnCl<sub>2</sub> (0.1 mmol). The resulting solution was then evaporated to dryness at 80 °C outside the glovebox, making sure that all volatiles were removed. A white-light pink precipitate forms after complete evaporation of the volatiles.

## Material characterization

### PXRD measurements

Powder X-Ray diffraction measurements were performed on a Bruker D8 Advance diffractometer with Cu K $\alpha$  radiation ( $\lambda=1.54$  Å) at 30 kV and 30 mA. The instrument was operating in a Bragg-Brentano geometry with a step increment of 0.02° and an acquisition time of one second per step.

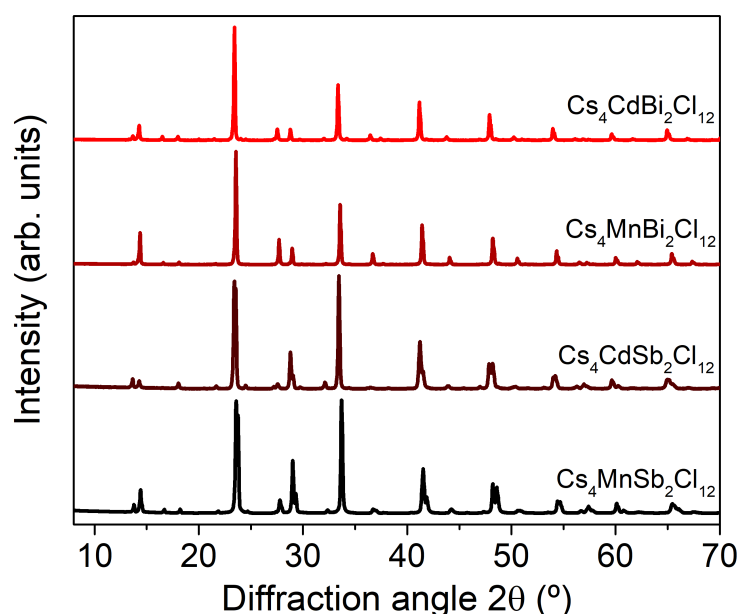

**Figure S3.** XRD patterns of the three new Cs-containing compounds compared with the Cs<sub>4</sub>MnSb<sub>2</sub>Cl<sub>12</sub> perovskite.

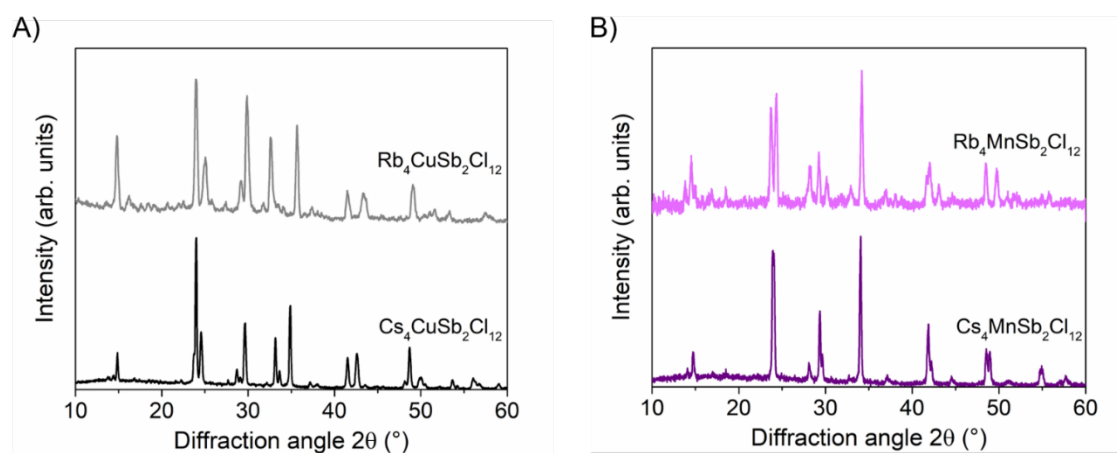

**Figure S4.** XRD patterns of A) the A<sub>4</sub>CuSb<sub>2</sub>Cl<sub>12</sub> (A = Rb and Cs) and B) A<sub>4</sub>MnSb<sub>2</sub>Cl<sub>12</sub> (A = Rb and Cs) perovskites.

### *Rietveld and Le Bail refinement*

For XRD, the samples were ground in an agate mortar and the loose powder was pressed into a diffractometer sample holder. X-ray powder diffraction patterns were collected in Bragg-Brentano geometry at room temperature with  $\text{CuK}\alpha$  radiation ( $\lambda=1.54183 \text{ \AA}$ ) in an Ultima IV diffractometer (from Rigaku) equipped with a D/tex detector. The sample patterns were recorded from  $5$  to  $100^\circ$  ( $2\theta$ ) in  $0.02^\circ$  steps and a scanning speed of  $2^\circ/\text{min}$ .

The structural refinement from XRD powder patterns was performed by the Rietveld method using the FULLPROF program.<sup>[12]</sup> The cell parameters and peak profiles were refined using the Le Bail pattern fitting method with pseudo-Voigt peak shape functions.<sup>[10]</sup> The background was modelled by a third-order polynomial fitting.

According to the XRD powder patterns, the synthesized samples of  $\text{Cs}_4\text{CdBi}_2\text{Cl}_{12}$  and  $\text{Cs}_4\text{CdSb}_2\text{Cl}_{12}$  was found to be hexagonal  $R\bar{3}m$ , a result in accordance to the structure obtained by single crystal.<sup>[13]</sup> The structure of these compounds was refined using the corresponding structural model obtained for single crystal. The final refinement, using the Rietveld method, was carried out on all atomic parameters while keeping the same values for the thermal parameters. Restrictions were also applied to interatomic distances.

The relevant crystallographic parameters; atomic positions (refined), thermal ( $B_{\text{iso}}$ ) and occupation (Occ) factors as well as bond distances and angles of the compounds are compiled in Table S6, S7, and S8 respectively. The XRD powder patterns (experimental and calculated) of the samples are shown in Figure S5.

The Rb-compounds suffer from some degradation when exposed to X-ray radiation, so the structural refinement by the Rietveld method was no possible on these samples. Instead, the cell parameters and peak profiles were modelled using the Le Bail pattern fitting method<sup>[13]</sup> using a monoclinic  $C2/m$  space group. The Le Bail fitting was also attempted with the  $R\bar{3}m$  trigonal space group, but the adjustment significantly improves with the monoclinic cell. The results are compiled in Table S9 and Figure S6.

**Table S6.** Experimental details for the XRD data recording and processing

|                                | <b>Cs<sub>4</sub>CdBi<sub>2</sub>Cl<sub>12</sub></b> | <b>Cs<sub>4</sub>CdSb<sub>2</sub>Cl<sub>12</sub></b> | <b>Cs<sub>4</sub>MnBi<sub>2</sub>Cl<sub>12</sub></b> |
|--------------------------------|------------------------------------------------------|------------------------------------------------------|------------------------------------------------------|
| <i>Data collection</i>         |                                                      |                                                      |                                                      |
| Diffractometer                 | Rigaku, Ultima IV                                    |                                                      |                                                      |
| Detector                       | D/tex                                                |                                                      |                                                      |
| Wavelength (Å)                 | CuK $\alpha$ , 1.54183                               |                                                      |                                                      |
| 2 $\theta$ range (°)           | 4-90                                                 | 4-90                                                 | 4-90                                                 |
| Step size (°)                  | 0.02                                                 | 0.02                                                 | 0.02                                                 |
| scanning speed (°/min)         | 2                                                    | 2                                                    | 2                                                    |
| <i>Indexing</i>                |                                                      |                                                      |                                                      |
|                                | M(18)= 51                                            | M(20)= 27                                            | M(20)=33                                             |
| <i>Unit cell</i>               |                                                      |                                                      |                                                      |
| Space Group                    | $R\bar{3}m$                                          | $R\bar{3}m$                                          | $R\bar{3}m$                                          |
| Cell Parameters                | a=b= 7.5903(2)                                       | a=b= 7.5930(1)                                       | a=b= 7.5446(1)                                       |
|                                | c = 37.1638(14)                                      | c = 36.8442(11)                                      | c = 36.9099(11)                                      |
| V(Å <sup>3</sup> )             | 1854.25(10)                                          | 1839.61(8)                                           | 1819.47(7)                                           |
| Z                              | 3                                                    | 3                                                    | 3                                                    |
| <i>Refinement</i>              |                                                      |                                                      |                                                      |
| # of reflections               | 223                                                  | 221                                                  | 216                                                  |
| <i># of refined parameters</i> |                                                      |                                                      |                                                      |
| Structural                     | 11                                                   | 11                                                   | 11                                                   |
| Profile                        | 11                                                   | 11                                                   | 11                                                   |
| R <sub>exp</sub>               | 2.45                                                 | 2.35                                                 | 2.54                                                 |
| R <sub>wp</sub>                | 8.45                                                 | 7.75                                                 | 8.08                                                 |
| R <sub>B</sub>                 | 6.54                                                 | 5.69                                                 | 5.96                                                 |
| S                              | 3.44                                                 | 3.30                                                 | 3.18                                                 |

**Table S7.** Refined atomic positions, thermal ( $B_{iso}$ ) and occupation (Occ) factors for the materials under study.

| Composition                                          | site | x         | y         | z         | Biso    | Occ |
|------------------------------------------------------|------|-----------|-----------|-----------|---------|-----|
| <b>Cs<sub>4</sub>Bi<sub>2</sub>CdCl<sub>12</sub></b> |      |           |           |           |         |     |
| Cs1                                                  | 6c   | 2/3       | 1/3       | 0.4597(3) | 1.58(4) | 1   |
| Cs2                                                  | 6c   | 0         | 0         | 0.6231(3) | 1.58(4) | 1   |
| Bi                                                   | 6c   | 2/3       | 1/3       | 0.5873(1) | 1.27(3) | 1   |
| Cd                                                   | 3b   | 0         | 0         | 1/2       | 2.0(1)  | 1   |
| Cl1                                                  | 18h  | 0.8397(9) | 0.1603(9) | 0.5394(4) | 2.6(3)  | 1   |
| Cl2                                                  | 18h  | 0.5085(7) | 0.4915(7) | 0.6287(4) | 2.6(3)  | 1   |
| <b>Cs<sub>4</sub>Sb<sub>2</sub>CdCl<sub>12</sub></b> |      |           |           |           |         |     |
| Cs1                                                  | 6c   | 2/3       | 1/3       | 0.4604(1) | 1.01(2) | 1   |
| Cs2                                                  | 6c   | 0         | 0         | 0.6231(1) | 1.01(2) | 1   |
| Sb                                                   | 6c   | 2/3       | 1/3       | 0.5879(1) | 0.8(2)  | 1   |
| Cd                                                   | 3b   | 0         | 0         | 1/2       | 1.37(2) | 1   |
| Cl1                                                  | 18h  | 0.8405(6) | 0.1595(6) | 0.5444(3) | 1.683   | 1   |
| Cl2                                                  | 18h  | 0.5053(6) | 0.4947(6) | 0.6289(2) | 1.683   | 1   |
| <b>Cs<sub>4</sub>Bi<sub>2</sub>MnCl<sub>12</sub></b> |      |           |           |           |         |     |
| Cs1                                                  | 6c   | 2/3       | 1/3       | 0.4585(1) | 1.64(2) | 1   |
| Cs2                                                  | 6c   | 0         | 0         | 0.6231(1) | 1.64(2) | 1   |
| Bi                                                   | 6c   | 2/3       | 1/3       | 0.5868(1) | 1.33(2) | 1   |
| Mn                                                   | 3b   | 0         | 0         | 1/2       | 2.3(2)  | 1   |
| Cl1                                                  | 18h  | 0.8394(6) | 0.1606(6) | 0.5374(3) | 2.1(3)  | 1   |
| Cl2                                                  | 18h  | 0.5071(6) | 0.4929(6) | 0.6294(2) | 2.1(3)  | 1   |

**Table S8.** Bond distances (in Å) and angles (°) from the refined structures: Cs<sub>4</sub>Bi<sub>2</sub>CdCl<sub>12</sub>, Cs<sub>4</sub>Sb<sub>2</sub>CdCl<sub>12</sub> and Cs<sub>4</sub>Bi<sub>2</sub>MnCl<sub>12</sub>.

| <b>Cs<sub>4</sub>Bi<sub>2</sub>CdCl<sub>12</sub></b> |                       | <b>Cs<sub>4</sub>Sb<sub>2</sub>CdCl<sub>12</sub></b> |                       |
|------------------------------------------------------|-----------------------|------------------------------------------------------|-----------------------|
| Bond distance (Å)                                    | Angle (°)             | Bond distance (Å)                                    | Angle (°)             |
| Cd-Cl1=2.568(2)                                      | Cl2-Bi-Cl2= 88.29(2)  | Cd-Cl1=2.662(2)                                      | Cl2-Sb-Cl2= 89.85(2)  |
| Bi-Cl1=2.511(2)                                      | Cl2-Bi-Cl1= 92.87(1)  | Sb-Cl1=2.606(2)                                      | Cl2-Sb-Cl1= 89.87(1)  |
| Bi-Cl2=2.897(2)                                      | Cl2-Bi-Cl1= 178.38(2) | Sb-Cl2=2.794(2)                                      | Cl2-Sb-Cl1= 179.61(2) |
|                                                      | Cl1-Bi-Cl1= 85.95(2)  |                                                      | Cl1-Sb-Cl1= 90.40(2)  |
|                                                      | Cl1-Cd-Cl1= 89.27(2)  |                                                      | Cl1-Cd-Cl1= 86.18(2)  |
|                                                      | Cl1-Cd-Cl1= 90.72(2)  |                                                      | Cl1-Cd-Cl1= 93.82(2)  |
|                                                      | Cl1-Cd-Cl1= 180.0     |                                                      | Cl1-Cd-Cl1= 180.0     |
|                                                      | Cd-Cl1-Bi= 176.67(2)  |                                                      | Cd-Cl1-Sb= 177.06(2)  |
| <b>Cs<sub>4</sub>Bi<sub>2</sub>MnCl<sub>12</sub></b> |                       |                                                      |                       |
| Bond distance (Å)                                    | Angle (°)             |                                                      |                       |
| Mn-Cl1=2.512(2)                                      | Cl2-Bi-Cl2= 87.56(2)  |                                                      |                       |
| Bi-Cl1=2.903(2)                                      | Cl2-Bi-Cl1= 93.87(1)  |                                                      |                       |
| Bi-Cl2=2.609(2)                                      | Cl2-Bi-Cl1= 178.01(2) |                                                      |                       |
|                                                      | Cl1-Bi-Cl1= 84.67(2)  |                                                      |                       |
|                                                      | Cl1-Mn-Cl1= 87.31(2)  |                                                      |                       |
|                                                      | Cl1-Mn-Cl1= 92.69(2)  |                                                      |                       |
|                                                      | Cl1-Mn-Cl1= 180.0     |                                                      |                       |
|                                                      | Cd-Cl1-Bi= 174.38(2)  |                                                      |                       |

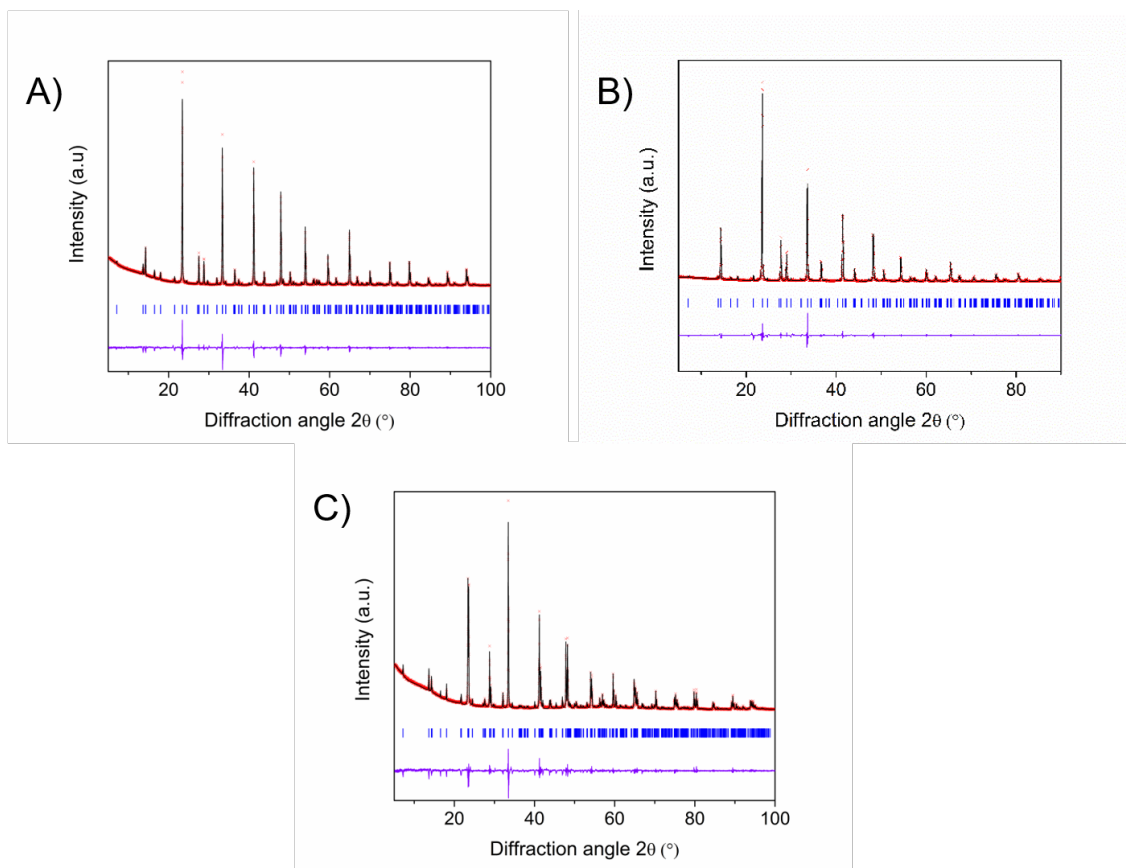

**Figure S5.** Observed (black line), calculated (crosses) and differences profiles (lower trace) for the Rietveld refinement for A)  $\text{Cs}_4\text{CdSb}_2\text{Cl}_{12}$ , B)  $\text{Cs}_4\text{CdBi}_2\text{Cl}_{12}$  and C)  $\text{Cs}_4\text{MnBi}_2\text{Cl}_{12}$ .

**Table S9.** Cell parameters of the Rb-materials obtained from the *Le Bail* refinement.

|                  | <b><math>\text{Rb}_4\text{CuSb}_2\text{Cl}_{12}</math></b> | <b><math>\text{Rb}_4\text{MnSb}_2\text{Cl}_{12}</math></b> |
|------------------|------------------------------------------------------------|------------------------------------------------------------|
| <i>Unit cell</i> |                                                            |                                                            |
| Space Group      | <i>C2/m</i>                                                | <i>C2/m</i>                                                |
| Cell Parameters  | a=13.161                                                   | a=13.127                                                   |
|                  | b=7.400                                                    | b=7.359                                                    |
|                  | c=12.872                                                   | c=12.996                                                   |
|                  | $\beta=111.65$                                             | $\beta=111.57$                                             |

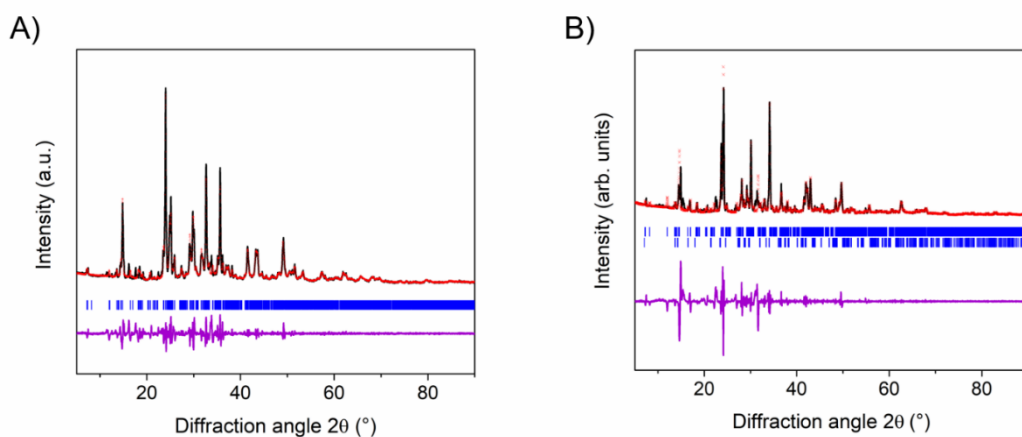

**Figure S6.** Observed (black line), calculated (crosses) and differences profiles (lower trace) for the Rietveld refinement for A)  $\text{Rb}_4\text{CuSb}_2\text{Cl}_{12}$  and B)  $\text{Rb}_4\text{MnSb}_2\text{Cl}_{12}$ .

### Thermogravimetric and differential scanning results

Thermogravimetric analysis was performed with a TGA Q5000 V3.17 Build 265 (TA Instruments) in nitrogen (flow rate 10 mL/min) with a platinum pan at a heating rate of 10 °C/min. The temperature range was from 30 °C to 500 °C for  $\text{Cs}_4\text{CdSb}_2\text{Cl}_{12}$ , from 30 °C to 700 °C for  $\text{Cs}_4\text{CdBi}_2\text{Cl}_{12}$  and  $\text{Cs}_4\text{MnBi}_2\text{Cl}_{12}$  and from 30 °C to 300 °C for  $\text{Rb}_4\text{CuSb}_2\text{Cl}_{12}$  and  $\text{Rb}_4\text{MnSb}_2\text{Cl}_{12}$ . Differential thermal analysis was performed with a DSC Q2000 V24.11 Build 124 (TA Instruments) in a nitrogen atmosphere (flow rate 50 mL/min) with aluminum pan at a heating rate of 10 °C/min. The temperature range was from –85 °C to 300 °C for all samples.

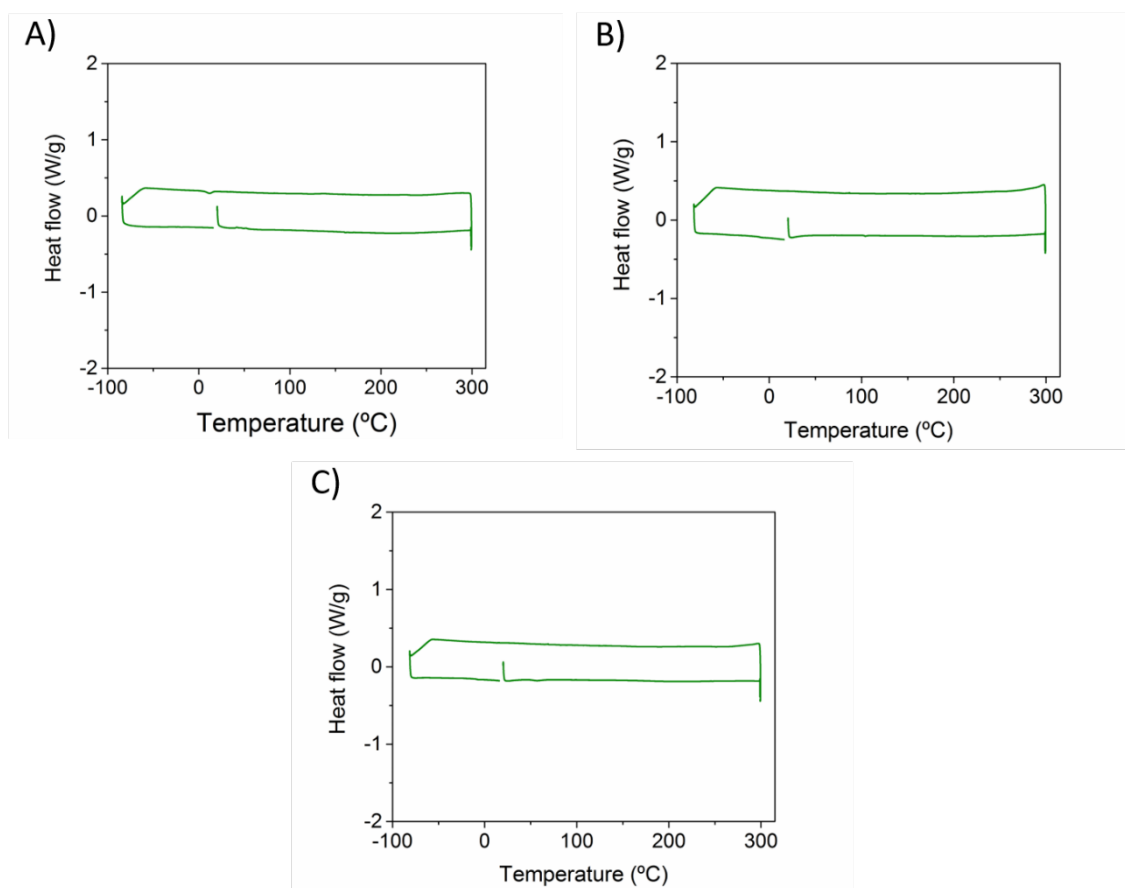

**Figure S7.** Differential scanning calorimetry of A)  $\text{Cs}_4\text{CdSb}_2\text{Cl}_{12}$ , B)  $\text{Cs}_4\text{CdBi}_2\text{Cl}_{12}$  and C)  $\text{Cs}_4\text{MnBi}_2\text{Cl}_{12}$ .

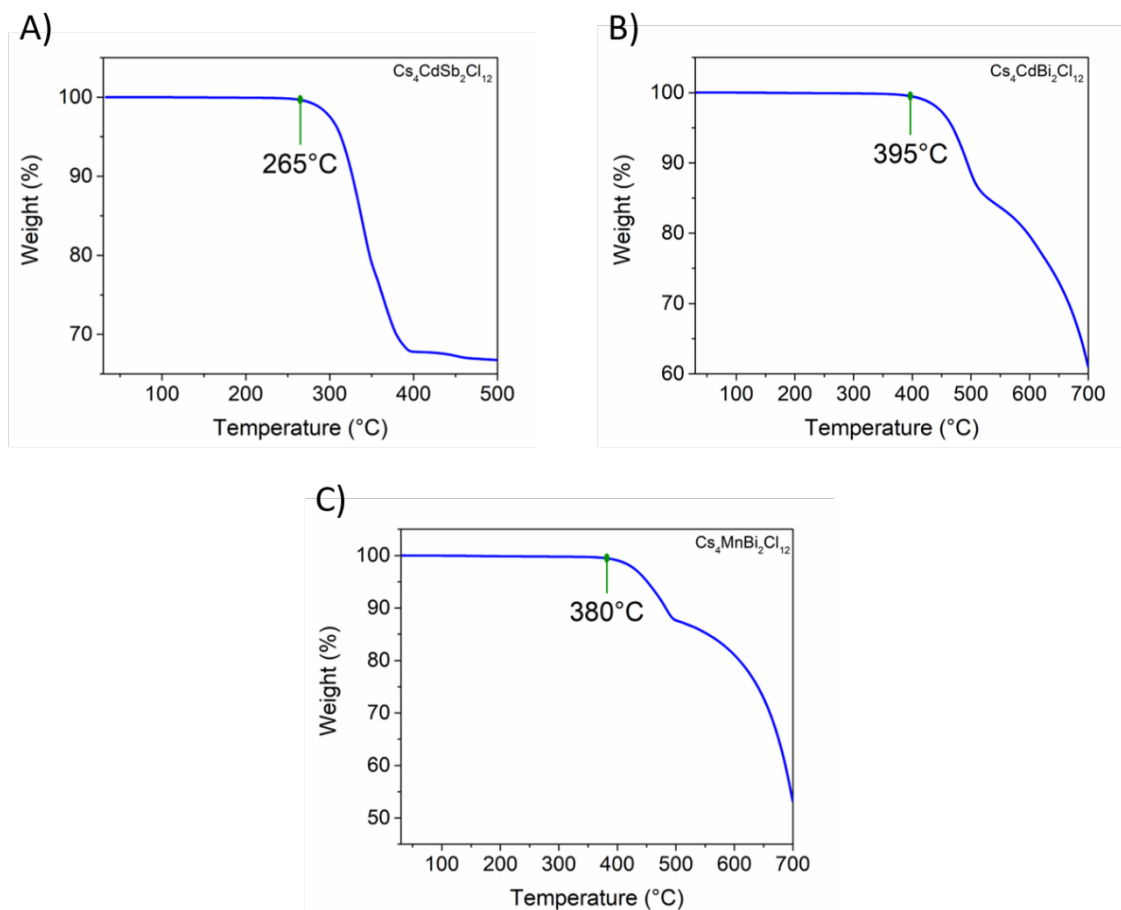

**Figure S8.** Thermogravimetric analysis of A)  $\text{Cs}_4\text{CdSb}_2\text{Cl}_{12}$ , B)  $\text{Cs}_4\text{CdBi}_2\text{Cl}_{12}$  and C)  $\text{Cs}_4\text{MnBi}_2\text{Cl}_{12}$ .

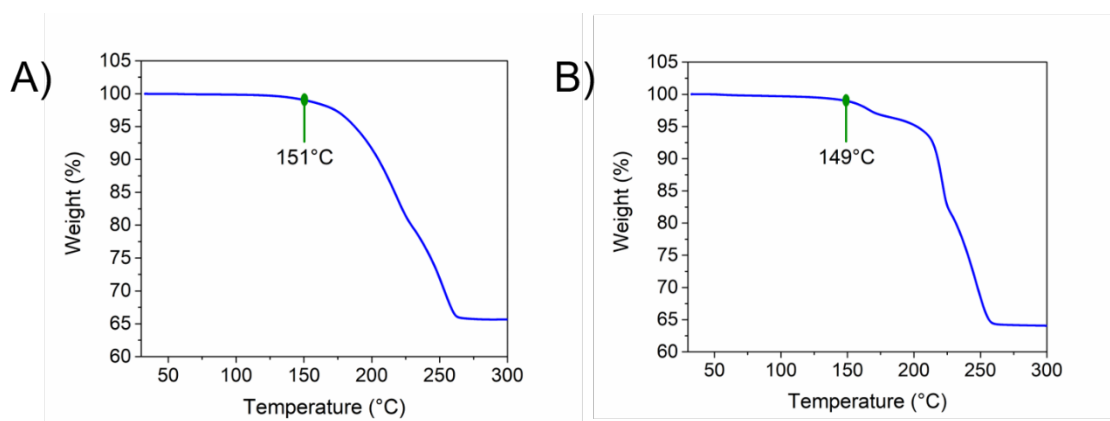

**Figure S9.** Thermogravimetric analysis of A)  $\text{Rb}_4\text{CuSb}_2\text{Cl}_{12}$  and B)  $\text{Rb}_4\text{MnSb}_2\text{Cl}_{12}$ .

### *Stability towards humidity and light*

The Cs-materials stability XRD measurements were performed on a D5000 Siemens diffractometer with Co K $\alpha$  radiation ( $\lambda=1.79$  Å) at 34 kV and 30 mA. The instrument was operating in a Bragg Brentano geometry with a step increment of 0.02° and an acquisition time of 0.6 s per step.

The Rb-materials stability XRD measurements were performed on an Ultima IV Rigaku diffractometer with Cu K $\alpha$  radiation ( $\lambda=1.54183$  Å) working at 40 kV and 44 mA. The instrument was operating in a Bragg Brentano geometry with a step increment of 0.02° and an acquisition time of 1.6° per minute.

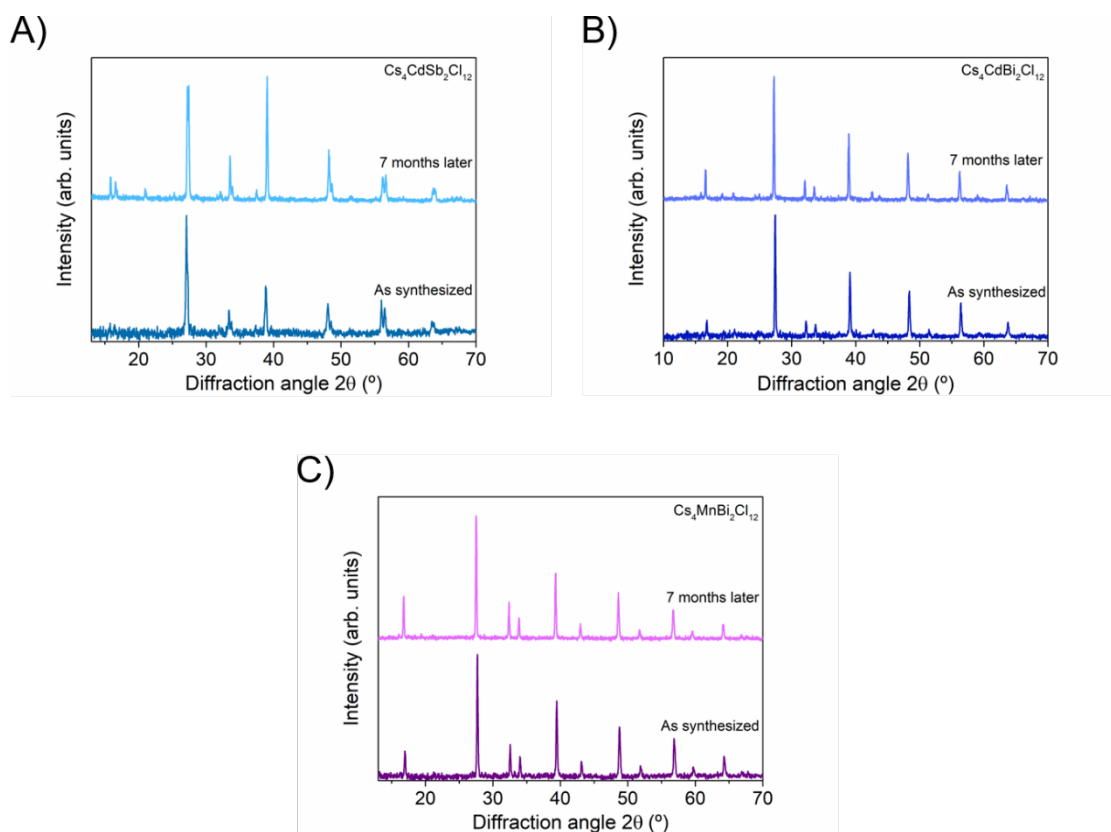

**Figure S10.** XRD patterns of A)  $\text{Cs}_4\text{CdSb}_2\text{Cl}_{12}$ , B)  $\text{Cs}_4\text{CdBi}_2\text{Cl}_{12}$  and C)  $\text{Cs}_4\text{MnBi}_2\text{Cl}_{12}$  after 7 months exposure to moisture and heat.

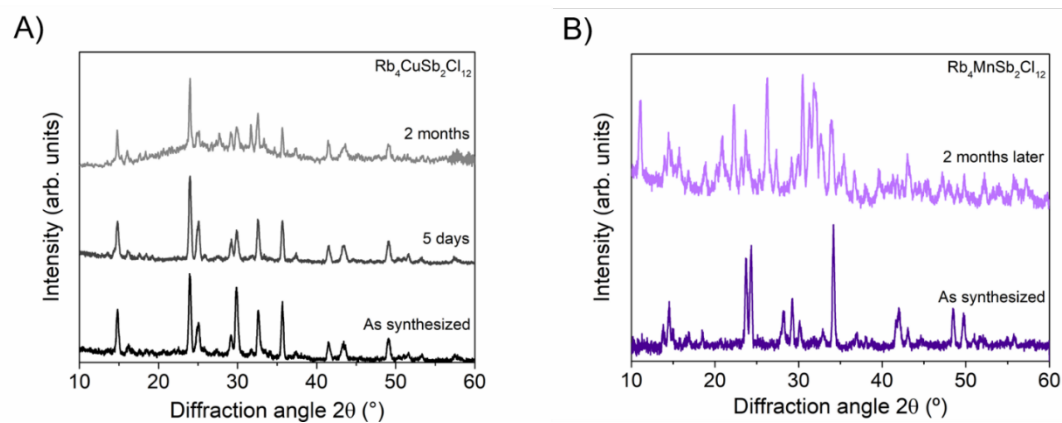

**Figure S11.** XRD patterns of A)  $\text{Rb}_4\text{CuSb}_2\text{Cl}_{12}$  and B)  $\text{Rb}_4\text{MnSb}_2\text{Cl}_{12}$  after 2 months exposure to moisture and heat.

### *Photoluminescence and absorbance measurements*

Excitation and emission photoluminescence spectra were recorded with a Horiba Fluoromax-4 spectrofluorometer using a 400 nm low-pass filter and the appropriate bandpass filter depending on the sample.

Absorption measurements were recorded using a Shimadzu spectrophotometer UV-2600 equipped with an ISR-2600 Plus integrated sphere and collected using absorbance data on a bulk powder sample. A BaSO<sub>4</sub> blank was used for the measurements.

Band gaps were extracted by fitting the linear regions of a plot of  $(\alpha * hv)^2$  vs  $E$  and  $(\alpha * hv)^{1/2}$  vs  $E$  (where  $E$  = photon energy) and determining the x-intercept.

**Table S10.** Calculated direct and indirect band gaps of the synthesized materials.

| Material                                             | Direct (eV) | Indirect (eV) |
|------------------------------------------------------|-------------|---------------|
| <b>Cs<sub>4</sub>CdBi<sub>2</sub>Cl<sub>12</sub></b> | 3.2         | 2.9           |
| <b>Cs<sub>4</sub>MnBi<sub>2</sub>Cl<sub>12</sub></b> | 3.1         | 2.8           |
| <b>Cs<sub>4</sub>CdSb<sub>2</sub>Cl<sub>12</sub></b> | 3.0         | 2.7           |
| <b>Rb<sub>4</sub>CuSb<sub>2</sub>Cl<sub>12</sub></b> | 0.9         | 0.6           |
| <b>Rb<sub>4</sub>MnSb<sub>2</sub>Cl<sub>12</sub></b> | 3.2         | 2.9           |

## References

- [1] P. E. Blöchl, *Phys. Rev. B* **1994**, 50, 17953–17979.
- [2] G. Kresse, J. Hafner, *Phys. Rev. B* **1993**, 47, 558–561.
- [3] G. Kresse, J. Furthmüller, *Comput. Mater. Sci.* **1996**, 6, 15–50.
- [4] J. P. Perdew, A. Ruzsinszky, G. I. Csonka, O. A. Vydrov, G. E. Scuseria, L. A. Constantin, X. Zhou, K. Burke, *Phys. Rev. Lett.* **2008**, 100, 136406.
- [5] Y. Hinuma, G. Pizzi, Y. Kumagai, F. Oba, I. Tanaka, *Comput. Mater. Sci.* **2017**, 128, 140–184.
- [6] B. Vargas, E. Ramos, E. Pérez-Gutiérrez, J. C. Alonso, D. Solis-Ibarra, *J. Am. Chem. Soc.* **2017**, 139, 9116–9119.
- [7] B. Vargas, R. Torres-Cadena, J. Rodríguez-Hernández, M. Gembicky, H. Xie, J. Jiménez-Mier, Y.-S. Liu, E. Menéndez-Proupin, K. R. Dunbar, N. Lopez, et al., *Chem. Mater.* **2018**, 30, 5315–5321.
- [8] A. Jain, S. P. Ong, G. Hautier, W. Chen, W. D. Richards, S. Dacek, S. Cholia, D. Gunter, D. Skinner, G. Ceder, et al., *APL Mater.* **2013**, 1, 011002.
- [9] Heyd, J., Scuseria, G. E., & Ernzerhof, M. *J. Chem. Phys.* **2003**, 118, 8207–8215.
- [10] Heyd, J., Scuseria, G. E., & Ernzerhof, M. *J. Chem. Phys.* **2006**, 124, 219906.
- [11] Wang, X.; Meng, W.; Xiao, Z.; Wang, J.; Mitzi, D.; Yan, Y. **2017**, arXiv:1707.09539 [cond-mat.mtrl-sci]. arXiv.org e-Print archive. <https://arxiv.org/abs/1707.09539>.
- [12] Rodríguez-Carvajal, J. *Physica B Condens Matter.* **1993**, 192, 55-69.
- [13] Le Bail, A. *Powder Diff.* **2005**, 20, 316-326.
